# Supplementary material for: Enhancing the photocatalytic activity of ZnSn(OH)6 achieved by gradual sulfur doping tactics
Source: Royal Society of Chemistry journal article supplement (doi:10.1039/c9nr01103j), 2019-01-01
Supplement: c9nr01103j1.pdf [file c9nr01103j1.pdf]

## **Enhancing the photocatalytic activity of ZnSn(OH)<sub>6</sub> achieved by a gradual sulfur doping tactics**

Xinyi Lian<sup>a</sup>, Zhou Chen<sup>a\*</sup>, Xiang Yu<sup>a</sup>, Tingting Fan<sup>a</sup>, Yunyun Dong<sup>a</sup>, Hesheng Zhai<sup>a</sup>, Weiping Fang<sup>a</sup> and Xiaodong Yi<sup>a\*</sup>

<sup>a</sup>. National Engineering Laboratory for Green Chemical Productions of Alcohols, Ethers and Esters, College of Chemistry and Chemical Engineering, Xiamen University, Xiamen 361005, P. R. China.

\* Corresponding author: [xdyi@xmu.edu.cn](mailto:xdyi@xmu.edu.cn) (X. D. Yi).

[20520160154064@stu.xmu.edu.cn](mailto:20520160154064@stu.xmu.edu.cn) (Z. Chen)

## Supporting information

The precursor was kept under sulfuration temperature at 160 °C, 180 °C and 200 °C. It is clearly shown that under 160 °C, 180 °C the precursor ZSH underwent an incomplete sulfuration compared to 200 °C, indicating that complete sulfuration of ZSH requires a suitable temperature and duration due to the thermodynamics and dynamics of the reaction.

RhB degradation experiments also carried out over sulfuration products and the mechanical mixing samples (Fig.S3c and S3d). The mechanical mixing samples showed no clear degradation activity compared to S-ZSH. The  $k_{app}$  follows the order: S-ZSH > ZSH+0.1ZnS > ZSH+0.1ZnS+0.1SnS<sub>2</sub> > ZSH+0.1SnS<sub>2</sub>.

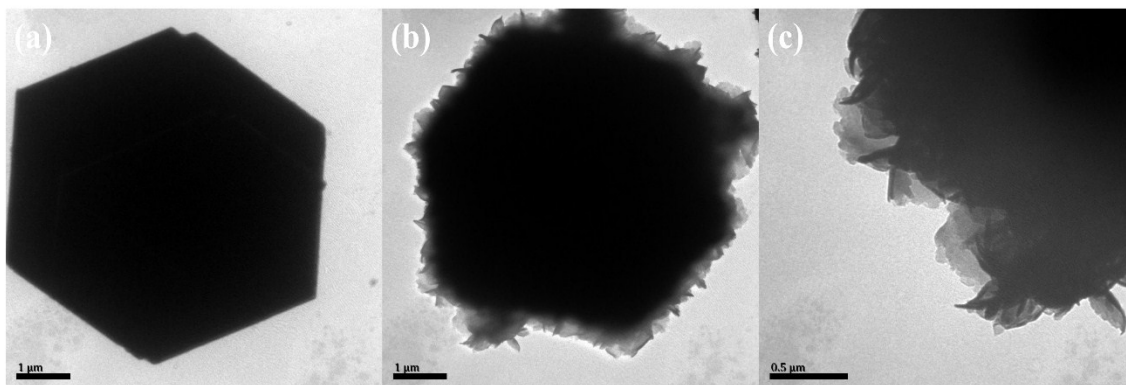

**Fig. S1** Transmission electron microscopy (TEM) images of (a) ZSH and (b) (c) S-ZSH

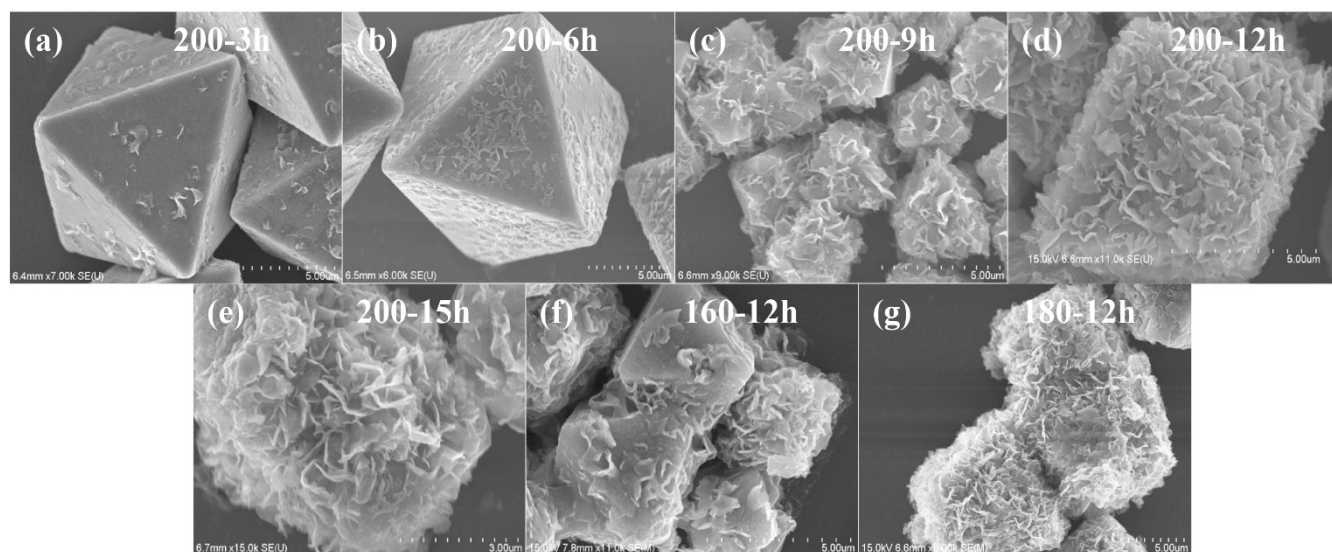

**Fig. S2** Scanning electron microscopy (SEM) images of S-ZSH at 200 °C with different sulfuration time (a) 3 h, (b) 6 h, (c) 9 h, (d) 12 h, (e) 15 h and S-ZSH (f) at 160 °C and (g) 180 °C with 12 h.

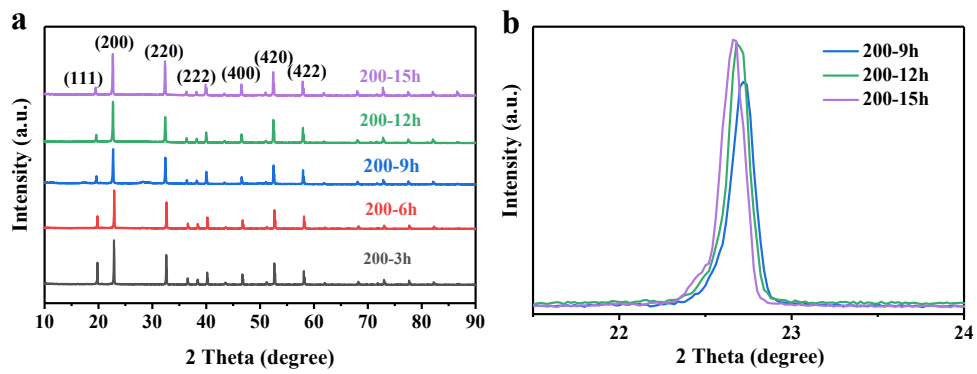

**Fig. S3** (a) XRD patterns and (b) magnified XRD patterns of S-ZSH with different sulfuration time.

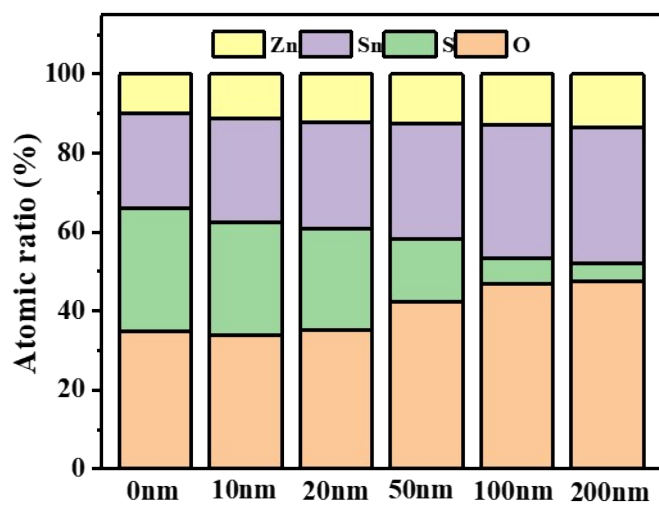

Fig. S4 The atomic ratio of S-ZSH based on XPS results.

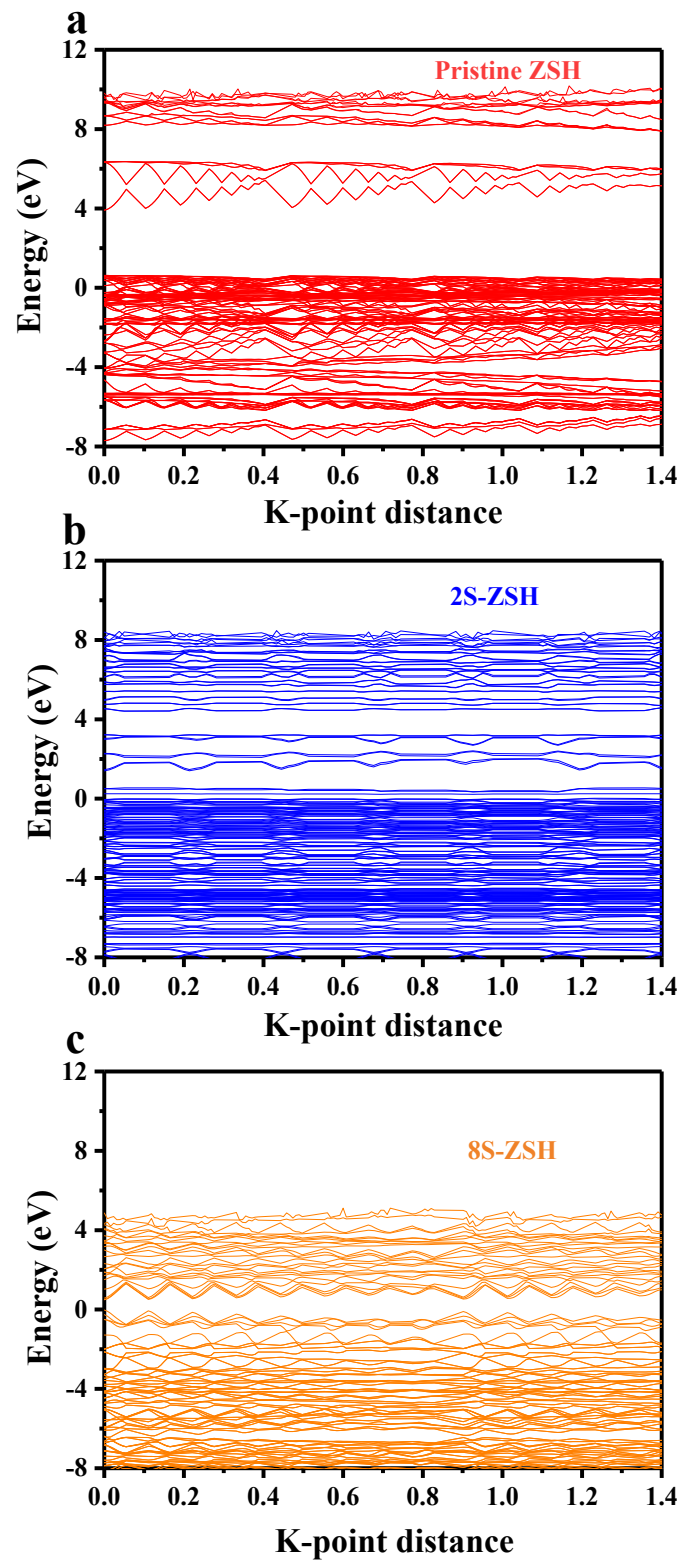

Fig. S5 The band structure of (a) pristine ZSH, (b) 2S-ZSH, (c) 8S-ZSH.

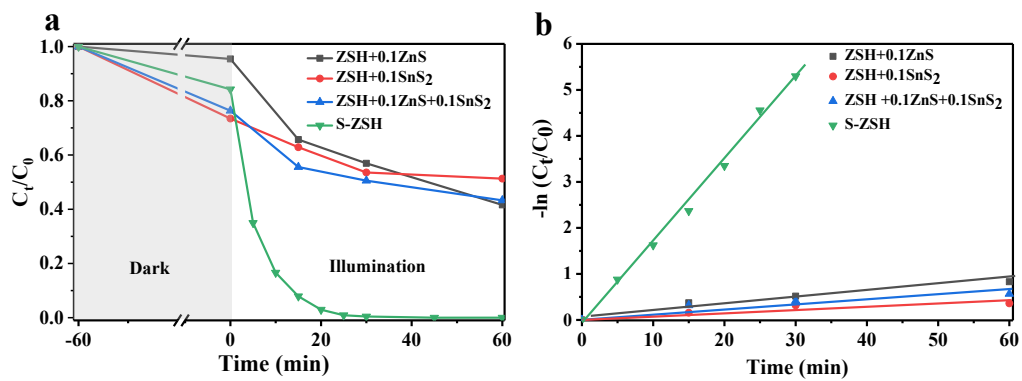

**Fig. S6** (a) RhB degradation and degradation rate constants based on pseudo-first order kinetic over ZSH, mechanical mixing ZSH+0.1ZnS, ZSH+0.1ZnS+0.1SnS<sub>2</sub> and ZSH+0.1ZnS.



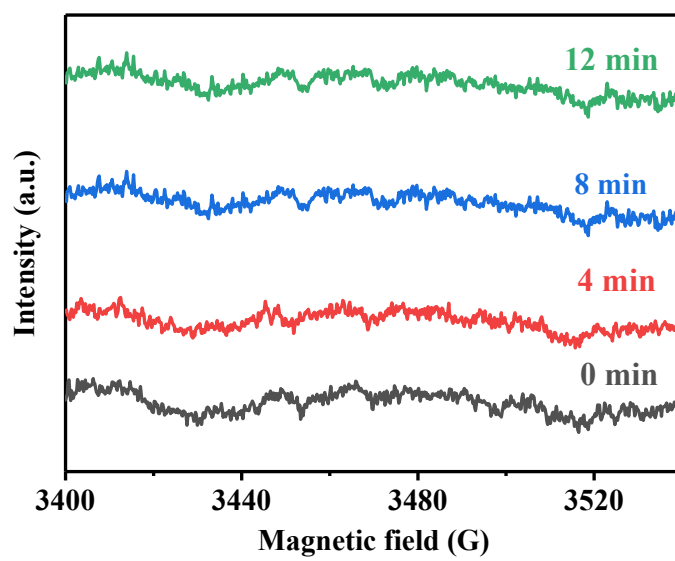

**Fig. S7** ESR spectra of DMPO-•OH adducts in water solution with S-ZSH.

**Table S1** The degradation efficiencies and detailed information of the catalysts mentioned above.

| Catalysts                                                   | Prepared method                                                 | Reasons for promoting efficiency                                                                                                                 | Degradation efficiency                                                                                |
|-------------------------------------------------------------|-----------------------------------------------------------------|--------------------------------------------------------------------------------------------------------------------------------------------------|-------------------------------------------------------------------------------------------------------|
| Ag@AgCl/ZSH heterojunction                                  | Ultrasonic assisted precipitation-photoreduction method         | Surface plasmon resonance (SPR) effect                                                                                                           | The degradation efficiency of RhB reach to 99.86% in 60 min <sup>[1]</sup> (ref. S1)                  |
| AgI/ZSH                                                     | Deposition–precipitation method                                 | Faster separation of electron-hole pairs with ZSH as an electron trap.                                                                           | The removal efficiency of RhB reached 100% in 40 min <sup>[2]</sup> (ref.S2)                          |
| Ag@Ag <sub>3</sub> PO <sub>4</sub> /ZSH                     | In situ deposition and photoreduction reaction method           | Surface plasmon resonance (SPR) effect                                                                                                           | The removal efficiency of RhB was 93.04% <sup>[3]</sup> (ref. S3) within 40 min                       |
| Ag <sub>3</sub> PO <sub>4</sub> /ZSH                        | In situ deposition                                              |                                                                                                                                                  | The degradation efficiency of RhB was 88.7% in 40 min <sup>[3]</sup> (ref. S3)                        |
| Pure ZSH nanocubes                                          | Simple chemical bath approach                                   |                                                                                                                                                  | The degradation efficiency of RhB was 2.83% in 40 min <sup>[3]</sup> (ref.S3)                         |
| Plasmonic Bi nanoparticles and BiOCl sheets codecorated ZSH | One-pot precipitation, hydrolysis and UV-photoreduction process | Surface plasmon resonance effect                                                                                                                 | The octahedral ZSH-3-Bi gave the greatest degradation of 91.4 % after 120 min <sup>[4]</sup> (ref.S4) |
| BiOI/ZSH                                                    | Deposition method                                               | Intimate contacts between ZnSn(OH) <sub>6</sub> and BiOI resulted in easier charge transfer and more efficient separation of electron–hole pairs | The best degradation efficiency of RhB was 95.8% in 40 min on 19.7% BiOI/ZSH <sup>[5]</sup> (ref. S5) |
| N-TiO <sub>2</sub>                                          | Sol-gel method                                                  |                                                                                                                                                  | The degradation efficiency of RhB was 30% in 40 min <sup>[3]</sup> (ref. S3)                          |

## Reference:

- [1] F. Chen, Q. Yang, C. Niu, X. Li, C. Zhang, G. Zeng, *RSC Advances* 5 (2015) 63152-63164.
- [2] F. Chen, Q. Yang, C. Niu, X. Li, C. Zhang, J. Zhao, Q. Xu, Y. Zhong, Y. Deng, G. Zeng, *Catalysis Communications* 73 (2016) 1-6.
- [3] F. Chen, Q. Yang, X. Li, D. Wang, Y. Zhong, J. Zhao, Y. Deng, C. Niu, G. Zeng, *Catalysis Communications* 84 (2016) 137-141.
- [4] H. Wang, X. Yuan, Y. Wu, G. Zeng, W. Tu, C. Sheng, Y. Deng, F. Chen, J.W. Chew, *Applied Catalysis B: Environmental* 209 (2017) 543-553.
- [5] H. Li, Y. Cui, W. Hong, B. Xu, *Chemical Engineering Journal* 228 (2013) 1110-1120.
